# Supplementary material
Source: PubMed Central journal article supplement (PMC4000172)
Supplement: NIHMS566880-supplement-Guyette_Supplemental_Docs.pdf [file NIHMS566880-supplement-Guyette_Supplemental_Docs.pdf]

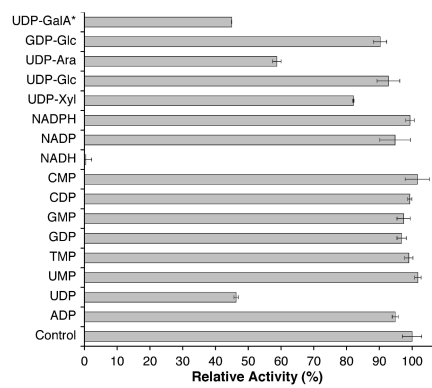

Supplemental Figure 1

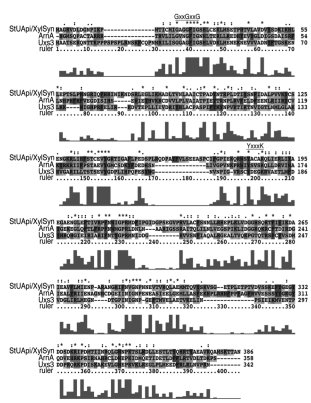

Supplemental Figure 2

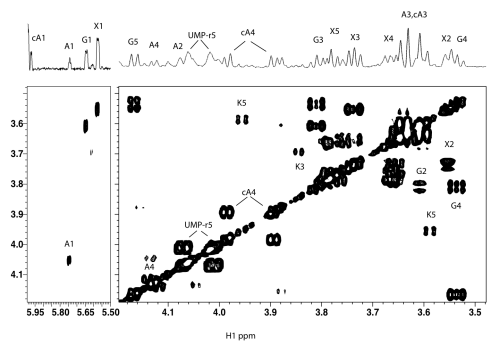

Supplemental Figure 3

Guyett et al., Supplementary Data

Supplementary Table 1. Proton chemical shifts of apiofuranosyl-1,2-cyclic phosphate in D<sub>2</sub>O at 25 °C.

|                | H1                         | H2         | H3 <sub>exo</sub> | H4           |
|----------------|----------------------------|------------|-------------------|--------------|
| $\delta$ (ppm) | 5.955                      | 4.551      | 3.562, 3.602      | 3.948, 3.859 |
| J(Hz)          | 4.3 (H1,H2)<br>15.1 (H1,P) | 5.8 (H2,P) | 12.3 (H3,H3)      | 9.4(H4,H4)   |
